# Supplementary material for: Thrombospondin 1 (THBS1) Promotes Follicular Angiogenesis, Luteinization, and Ovulation in Primates
Source: Front Endocrinol (Lausanne). 2019 Nov 7;10:727. doi: 10.3389/fendo.2019.00727 (PMC6855263; doi:10.3389/fendo.2019.00727)
Supplement: Supplementary file 1 [file Table_1.xlsx]

## Sheet: Sheet1
Supplemental Table 1: Antibodies
Peptide/protein target	Antigen sequence (if known)	Name of Antibody	Manufacturer, catalog #, and/or name of individual providing the antibody	Species raised in; monoclonal or polyclonal	Dilution used	RRID
THBS1	Asn19-Pro1170	Human thrombospondin 1 antibody	R&D Systems, AF3074-SP	goat polyclonal	2.5 µg/ml (immunostaining); 0.01 µg/ml (western)	AB_2201958
THBS4	Ala22-Asn961	Human thrombospondin 4 antibody	R&D Systems, AF2390-SP	goat polyclonal	2.9 µg/ml (immunostaining); 0.01 µg/ml (western)	AB_2202087
alpha-actin	not available	Anti-actin antibody,clone C4	Millipore, MAB1501	mouse monoclonal	5 µg/ml (estimated)	AB_2223041
none	not applicable	Control Rabbit IgG	Abbiotec #254513	rabbit polyclonal	not applicable	AB_2715565
Ki67	Human recombinant peptide corresponding to a 1002 bp Ki-67 cDNA fragment	Ki67 clone MIB-1	Dako, #M7240	mouse monoclonal	0.35 µg/ml	AB_2142367
Details regarding antibodies used during the conduct of these studies.
